# Supplementary material
Source: PubMed Central journal article supplement (PMC2533575)

**Supplementary Fig. S1.** Examples of *P-cloud* annotation of regions of human chromosome 1, and comparison with *RepeatMasker*. Exemplary UCSC genome browser views are shown with *P-cloud* annotation (green) and *RepeatMasker* annotation (black), regions identified and annotated by the *P-cloud* method that were previously annotated as (A) gene families, (B) pseudogenes, and (C) segmental duplications, or (D) previously unidentified (potentially new) repeats. The human genome browser views are based on the May-2004 version of the genome.

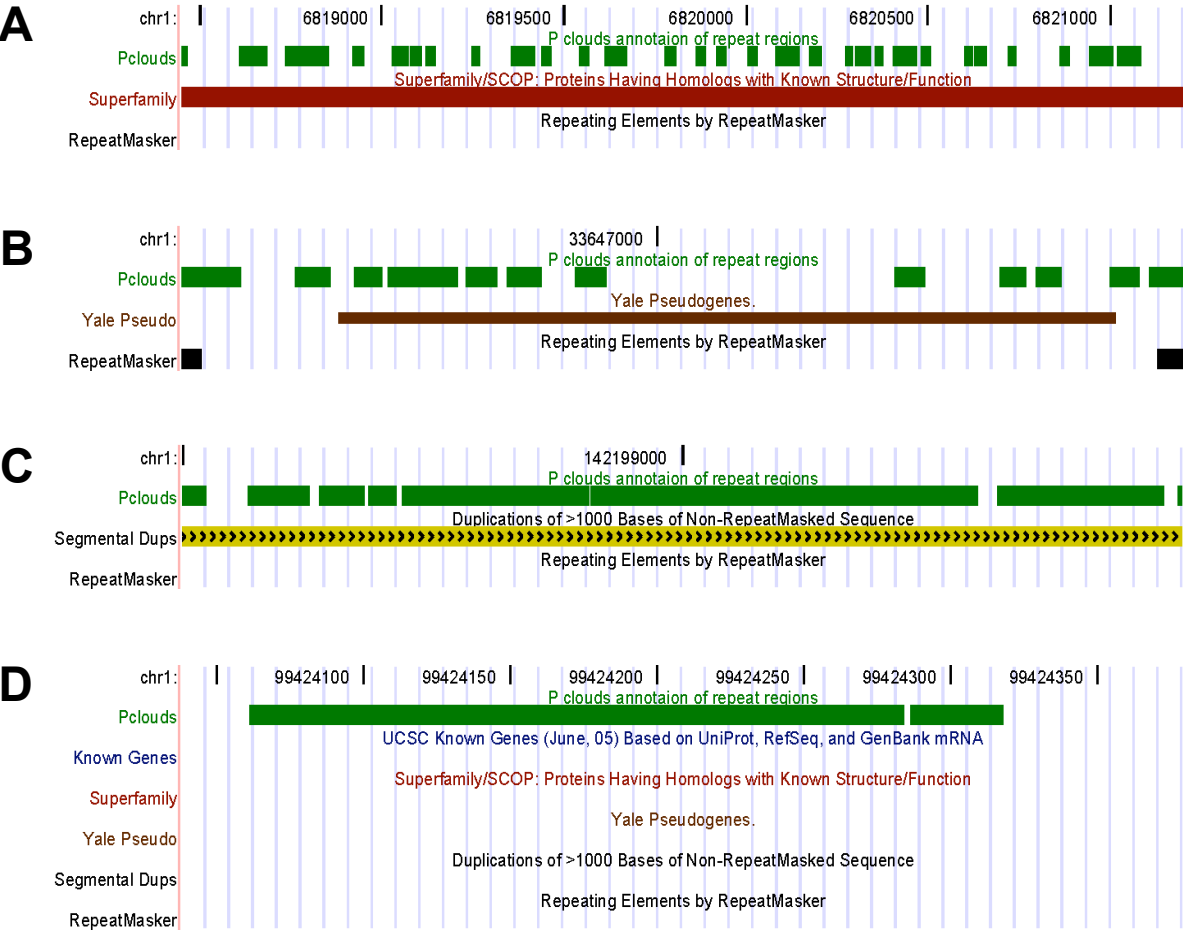

Supplement: NIHMS59887-supplement-03.pdf [file NIHMS59887-supplement-03.pdf]
